1 **Measuring popularity of ecological topics in a temporal dynamical**  
2 **knowledge network**

3 Tian-Yuan Huang<sup>1</sup>, Bin Zhao<sup>1,\*</sup>

4

5 <sup>1</sup>Ministry of Education Key Laboratory for Biodiversity Science and  
6 Ecological Engineering, and Coastal Ecosystems Research Station of the  
7 Yangtze River Estuary, Fudan University, Shanghai, China

8

9 First Author: Tian-Yuan Huang; Email – [huang.tian-yuan@qq.com](mailto:huang.tian-yuan@qq.com)

10 \*Corresponding Author: Bin Zhao; Email – [zhaobin@fudan.edu.cn](mailto:zhaobin@fudan.edu.cn)

11

12 Declarations of interest: none

13

## 14 **Abstract**

15 As interdisciplinary branches of ecology are developing rapidly in the 21<sup>st</sup>  
16 century, contents of ecological researches have become more abundant  
17 than ever before. Along with the exponential growth of number of  
18 published literature, it is more and more difficult for ecologists to get a  
19 clear picture of their discipline. Nevertheless, the era of big data has  
20 brought us massive information of well documented historical literature  
21 and various techniques of data processing, which greatly facilitates the  
22 implementation of bibliometric analysis on ecology. Frequency has long  
23 been used as the primary metric in keyword analysis to detect ecological  
24 hotspots, however, this method could be somewhat biased. In our study,  
25 we have suggested a method called PAFit to measure keyword popularity,  
26 which considered ecology-related topics in a large temporal dynamical  
27 knowledge network, and found out the popularity of ecological topics  
28 follows the “rich get richer” and “fit get richer” mechanism. Feasibility of  
29 network analysis and its superiority over simply using frequency had been  
30 explored and justified, and PAFit was testified by its outstanding  
31 performance of prediction on the growth of frequency and degree. In  
32 addition, our research also encourages ecologists to consider their domain  
33 knowledge in a large dynamical network, and be ready to participate in  
34 interdisciplinary collaborations when necessary.

35 **Keyword:** co-word analysis; degree; ecology; frequency; keyword  
36 popularity; network analysis; PAFit

## 37 **1. Introduction**

38 Early in 1994, historian Donald Worster had made an interesting remark  
39 in his book, “Ecology achieved intellectual sophistication, academic  
40 prominence, and financial security in the postwar years, but also lost  
41 much of its coherence. It broke down into a cacophony of subfields,  
42 including ecosystematists, populationists, biospherians, theoretical  
43 modelers, forest and range managers, agroecologists, toxicologists,  
44 limnologists, and biogeographers”(Worster 1994). By now, this remark  
45 still stands and could not be more correct. The scope of ecological  
46 research is expanding unprecedentedly in 21<sup>st</sup> century. Relations between  
47 biological systems and surrounding environments are of great  
48 complexity, numerous disciplines are joining ecology to answer  
49 demanding ecological questions and meet the global challenge. This has  
50 opened a door for discipline integration, and various branches of ecology  
51 had emerged in recent decades, with new theories, methods and  
52 technologies (Thompson *et al.* 2001). As the number of ecological  
53 literature is growing faster and faster in recent years(Nunez Mir *et al.*  
54 2016), it is becoming more and more difficult for ecologists to get a clear  
55 picture of knowledge structure in their study area, not to mention the

56 broad overview of the whole discipline.

57 But thanks to the era of big data, it is now getting easier and easier for  
58 scientists to get mass literature data. Together with the handy tools from  
59 automated content analysis, scientists can now carry out bibliometric  
60 research and dig deep into the historical ecological literature. (Nunez Mir  
61 *et al.* 2016; Kim *et al.* 2018). In this way, new insights on the trends of  
62 ecology could be discovered in novel ways. This could be an excellent  
63 complement to the traditional literature overview.

64 In bibliometric studies, keyword analysis, as core content summary of  
65 articles, has long been used to identify research focus in ecological  
66 disciplines (Budilova *et al.* 1997; Liu *et al.* 2011; Song & Zhao 2013;  
67 Stork & Astrin 2014; Wang *et al.* 2015; Romanelli *et al.* 2018). Author  
68 keywords contain information that authors consider as most concerned  
69 and relevant to their studies, and high-frequency keywords are deemed to  
70 reflect the hot issues, and could be used to reveal the research trends (Li  
71 *et al.* 2011; Li *et al.* 2017; Yang *et al.* 2017; Yin *et al.* 2018). Usually,  
72 keywords are ranked according to their frequency and sorted in a  
73 descending order, high ranking keywords are showed in a list, and we get  
74 an overview of the research hotspots from these most frequently used  
75 author keywords. By implementing the above method, it is already  
76 assumed that topics behind high-frequency keywords are more popular  
77 than others.

78 We have doubts about this assumption, for a topic is not only popular for  
79 frequently occurring in literatures, but also for it could be widely  
80 accepted in public and co-occurred with various other topics in the same  
81 article. Previous studies have applied co-word analysis to address this  
82 problem (Zhuang *et al.* 2013; Wang *et al.* 2015; Chen *et al.* 2016;  
83 Alexandre-Benavent *et al.* 2018). Using keyword co-occurrence  
84 network, the relationships of keywords could be depicted, and the  
85 centrality of keywords could be vividly showed. Nevertheless, most co-  
86 word analyses were restricted to simple descriptions of the network, few  
87 studies dig deep into the application of social network analysis, and  
88 quantitative studies were seldom carried out to further explore the trends  
89 of ecology. Therefore, most of the times frequency is still the only metric  
90 to measure keyword popularity in bibliometric analysis.

91 To fill this gap, we first constructed the ecological knowledge network  
92 with 247,764 articles from 137 leading ecological journals based on the  
93 co-occurrence of author keywords. Then we asked research questions as  
94 follows: Is network analysis feasible to detect hotspots in ecology? What  
95 are the possible risks when using frequency to measure keyword  
96 popularity compared with network-based methods? When the previous  
97 questions were answered, we proposed an approach called PAFit, which  
98 had been applied successfully in the research of scientific collaboration  
99 (Ronda-Pupo & Pham 2018), to measure keyword popularity in a

100 temporal dynamical network. In the proposed method, the keywords in  
101 ecological journals were considered as ecology-related topics, and tested  
102 to see if they follow “rich get richer” and “fit get richer” mechanism. At  
103 last, our proposed method was testified by a comparative study. The main  
104 objective of our work was to propose a new method to measure keyword  
105 popularity. But other than this, we hoped our study could encourage  
106 ecological researchers to consider their domain knowledge in a broad  
107 network, and be ready to join transdisciplinary researches while focusing  
108 on their specific studies.

## 109 **2. Materials and Methods**

### 110 **2.1. Data source**

111 To build a comprehensive database of ecological literature information, we  
112 consulted the latest ISI Journal Citation Reports (2017) and chose journals  
113 under the “ecology” category (more details could be found in S1 Table).  
114 The information of ecological journals was downloaded from SCOPUS  
115 (<https://www.scopus.com>), where we could export at most 2,000  
116 documents per time in csv format efficiently. For the reason that digital  
117 archives of historical data were not so complete in the 1900s, we limited  
118 our time range to the recent 30 years, namely from 1988 to 2017. Also,  
119 only papers with document type of “article” were chosen, and entries

120 containing missing values were excluded in our database. As keywords are  
121 not case-sensitive, all the keywords were converted to lower case, and  
122 duplicated records were merged. After data cleaning, we finally got a  
123 dataset with 247,764 papers from 137 leading ecological journals (detailed  
124 names of journals could be found in S1 Table). The annual article number  
125 was increasing steadily in our dataset, which led to the bursting number of  
126 distinct keywords that poured into the ecological disciplines (Fig.1). Since  
127 these articles came from journals categorized as “ecology”, keywords in  
128 these articles were considered to be relevant with ecology. Therefore, these  
129 keywords possess the potential to become ecological topics in the  
130 community of ecological researchers.

131

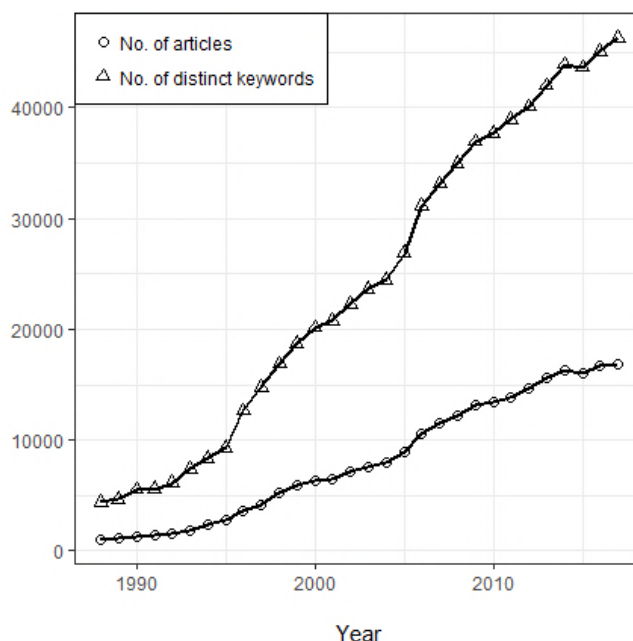

132

133 **Fig.1 Annual article number and distinct keyword number based on our data source.**

## 134 **2.2. Construction of ecological knowledge network**

135 To construct ecological knowledge network, we have a basic assumption  
136 that keywords co-occurred in the same article are related to each other.  
137 For a single article, when we get the keywords list, we could gain the  
138 keyword co-occurred relations among these keywords, which provide an  
139 edge list to construct the final network (Fig.2). We could find that  
140 keywords in the same article are all linked to each other in the network.  
141 When we had more papers, we could extract the keyword co-occurred  
142 relations from large amount of articles and formed a huge complex  
143 knowledge network (Fig.3). We believed this network could provide  
144 important information on knowledge structure of ecology and had the  
145 potential to detect and quantify ecological research hotspots. The whole  
146 network establishment procedure was conducted in R with packages  
147 including ‘igraph’(Csardi & Nepusz 2006), ‘ggraph’ (Pedersen 2017)and  
148 ‘tidygraph’(Pedersen 2018).



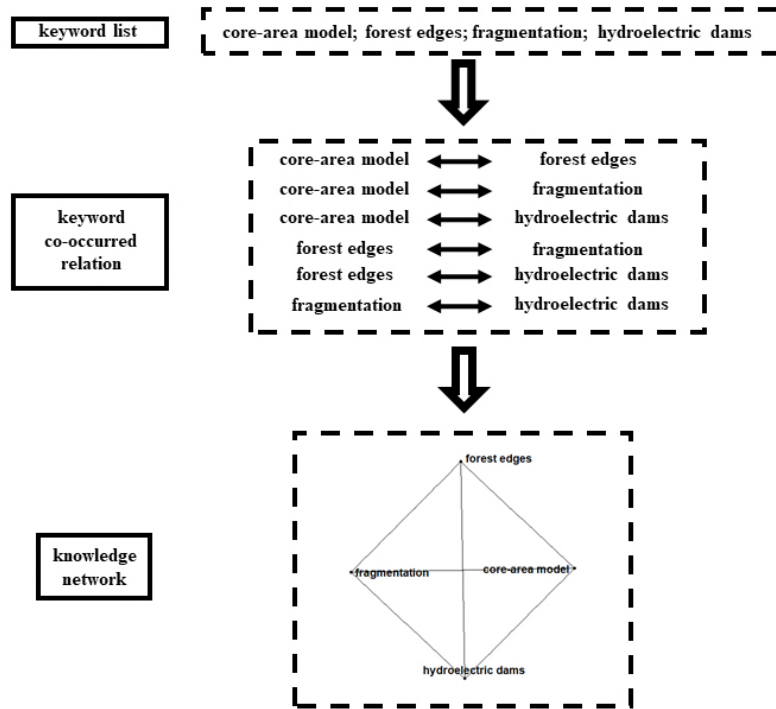

149

150 **Fig.2 Construction of knowledge network from a single article. (The sample displayed here**  
 151 **came from a real article published in *Acta Amazonica*. Ferreira *et al.* 2012)**

152

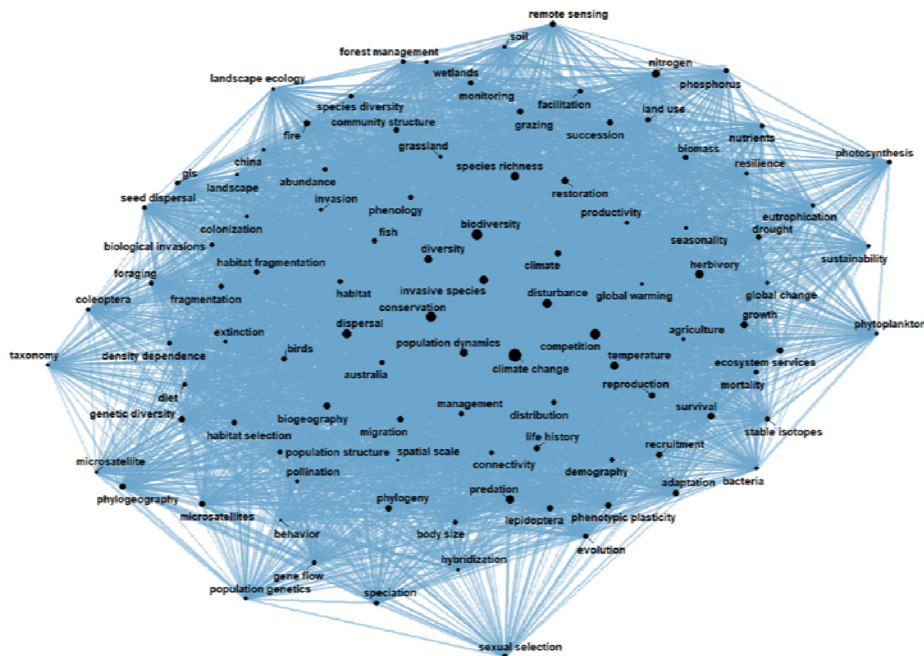

153

154 **Fig.3 Ecological knowledge network. The above network is established from data covering**  
 155 **30 years (1988-2017), only 100 keywords with largest degree are displayed (the total network**  
 156 **is an undirected graph with 312,767 nodes and 3,321,885 edges). The sizes of nodes are**

157 rescaled by the node degree, and the width of edges are proportional to the co-occurring  
158 times of the two keywords.

159

### 160 **2.3. Interpretations of concepts from network analysis in our study**

161 In graph theory, numerous metrics are used to describe network  
162 properties in different levels, including node-level, group-level and  
163 network-level (Al-Taie & Kadry 2017). Because we wanted to quantify  
164 the popularity of ecological topics, we had first chosen the simplest but  
165 maybe the most effective node-level centrality metric, degree. The degree  
166 of a node is the number of links it has with other nodes, therefore, the  
167 popularity of the node is determined by how many nodes it is connected  
168 to (Luke 2015; Al-Taie & Kadry 2017). When it comes to our study,  
169 degree of a keyword (represented by a node in the network) is the  
170 measure of the capability to co-occur with other keywords in the same  
171 article. As each keyword represents an ecology-related topic, the  
172 popularity of the topic could be reflected by how many different topics it  
173 could be related to.

174 We had also used network-level metric density to depict the compactness  
175 of the knowledge network. By definition, the density is the proportion of  
176 edges in the network to the maximum number of possible edges. As our  
177 network is undirected, the density  $D(G) = 2m / (n*(n-1))$ , where  $n$  is the  
178 total node number and  $m$  is the total edge number.

179

180 **2.4. Comparison of different results yielded by frequency and degree**  
181 **when measuring keyword popularity**

182 We believed that degree calculated in the constructed knowledge network  
183 could be a good competitor against the commonly used metric frequency  
184 on the task of measuring keyword popularity, therefore we tried to find the  
185 difference in the results yielded by frequency and degree. First, we  
186 gathered all the keywords from ecological articles during the recent three  
187 decades, and calculated their frequency and degree. Then we ranked the  
188 keywords according to both metrics, which generated two different ranking  
189 lists. The differences between frequency ranking and degree ranking were  
190 calculated so we could find the main distinctions between them. Only top  
191 1,000 keywords in degree ranking list or frequency ranking list were taken  
192 into consideration, so that keywords we selected had certain influences in  
193 ecology. At last we made two lists, one for keywords with relatively low  
194 frequency but high degree, the other for keywords with relatively high  
195 frequency but low degree. Geographical names like “france” and “oregon”  
196 were excluded and only 20 keywords with largest differences were shown  
197 in the lists (Table 1, Table 2).

198

199

## 200 **2.5. Measuring keyword popularity in temporal dynamical network**

201 In reality, ecological knowledge network was not built up in one step like  
202 we did in computer program, but growing brick by brick over time.  
203 Therefore, the knowledge network was not static, but temporal dynamical.  
204 Among the various network growing mechanisms, preferential attachment  
205 and node fitness might be two of the simplest ones, simple but useful.  
206 Preferential attachment, also known as “rich get richer” phenomenon,  
207 believes that pioneers with large degree have an advantage over  
208 newcomers and are more likely to form connections to other nodes in the  
209 future (Barabási & Albert 1999). On the other hand, node fitness, which is  
210 often described as “fit get richer” phenomenon, illustrates that newcomers  
211 could occasionally surpass the pioneers when they are intrinsically more  
212 attractive (Bianconi & Barabási 2001). We believed the combination of  
213 these two mechanisms could describe the dynamic patterns in our  
214 ecological knowledge network. Ecological topics being mentioned  
215 numerous times had solid theoretical basis or practical experience  
216 accumulation, thus are more likely to be included as keywords in the future.  
217 Nevertheless, new ecological topics never stop challenging the old ones  
218 and be ready to take their places in the field of ecological disciplines. This  
219 hypothesis led us to do the joint estimation of preferential attachment and  
220 node fitness in our ecological knowledge network, which would help us

221 measure the keyword popularity more appropriately.

222 PAFit, a Bayesian statistical method, was used to estimate preferential  
223 attachment function and node fitness non-parametrically (Thong *et al.*  
224 2016). In this method, the probability  $\mathbf{P}_i$  for node  $\mathbf{v}_i$  to get a new edge in  
225 the future is proportional to the product of attachment function  $\mathbf{A}_{ki}$  and the  
226 fitness of the node  $\boldsymbol{\eta}_i$ :  $\mathbf{P}_i \propto \mathbf{A}_{ki} \times \boldsymbol{\eta}_i$ . The attachment function  $\mathbf{A}_k = \mathbf{k}^\alpha$ ,  
227 where  $\mathbf{k}$  is the degree of the node, and  $\alpha$  is called attachment component.  
228 With the edge list with temporal information, the global attachment  
229 component  $\alpha$  and fitness of each node  $\boldsymbol{\eta}_i$  could be estimated non-  
230 parametrically. R package ‘PAFit’ was used to complete the whole task.  
231 Mathematical background and the application of the package could be  
232 found in Pham *et al.* 2017.

233 For our case, the product of attachment function and node fitness was  
234 calculated, this product (called as PAFit in our study) is used to measure  
235 the popularity of the keywords in the network. Due to the consideration of  
236 “rich-get-richer” and “fit-get-richer” phenomenon, PAFit is supposed to be  
237 superior to other simple metrics such as frequency and degree. However,  
238 this hypothesis should not be self-testifying but supported by facts.  
239 Therefore, we design the following experiment to verify our assumption.

240 2.6. Comparison of the predictive ability of frequency, degree and PAFit  
241 when measuring keyword popularity

242 To perform our experiment, we should answer a vital question in the first  
243 place: What is popularity? In the dictionary, popularity is “the quality or  
244 state of being popular” (“Popularity.” Merriam-Webster.com), while the  
245 definitions of popular include “of or relating to the general public” and  
246 “frequently encountered or widely accepted” (“Popular.” Merriam-  
247 Webster.com). Therefore, a popular keyword should be related to large  
248 amount of other keywords and occurring frequently in the ecological  
249 journals. These two characters could be well represented by degree and  
250 frequency mentioned in the former section.

251 Popularity of keywords should not only be descriptive but also predictive.  
252 In other words, when we say a keyword is popular, it has been popular for  
253 some time, and this trend will not disappear in the near future. For instance,  
254 if we gain the popularity of keywords in a specific time period, we might  
255 be able to predict the growth of the keywords in the following years.  
256 Therefore, we split our data into two parts, and tried to use the historical  
257 keyword popularity to predict the growth of keywords’ frequency and  
258 degree in the coming three years. The experiment procedure was designed  
259 as follows: 1. Construct the ecological knowledge network with data from  
260 1988 to 2014, and calculate the frequency, degree and PAFit for every

261 keyword appeared in these 27 years; 2. Construct the ecological knowledge  
262 network with data from 1988 to 2017, calculate the frequency and degree  
263 for every keyword appeared in the total 30 years; 3. Subtract the frequency  
264 of 27 years from frequency of 30 years, and we gain the change (or growth)  
265 of frequency in the recent three years (namely 2015-2017). The same is  
266 done to the keywords' degree. Note that keywords emerging in the recent  
267 three years but not in the previous 27 years would be excluded from our  
268 analysis; 4. Fit a simple linear regression model using frequency, degree  
269 and PAFit in the former 27 years to predict the growth of frequency and  
270 degree in the following 3 years respectively. Compare the results and see  
271 if PAFit yields better predictions.

## 272 2.7. Commonality analysis to clarify relations of popularity metrics

273 This analysis was based on the regression models we got in the former  
274 section. Instead of using one metric at a time, we could include all three  
275 metrics and run a multiple regression. Obviously, the three metrics we  
276 compared are closely related to each other. Therefore, in the task of  
277 predicting the frequency growth and degree growth, they would share some  
278 explanatory power while each metric has its unique explanatory power.  
279 Commonality analysis is capable of decomposing the variance of  $R^2$  into  
280 unique and common variance of predictors. Though we did not intend to  
281 actually implement multiple regression to gain a better prediction of the

282 popularity, this analysis could help us better understand the correlations  
283 among the three metrics. For instance, when we used PAFit to measure  
284 popularity, we got an adjusted  $R^2$ , if adding frequency to do multiple  
285 regression was not going to rise up overall  $R^2$ , then PAFit might contain  
286 enough power to depict popularity. In another way, when we have the  $R^2$   
287 yielded by the frequency alone, and we found that including PAFit could  
288 promote the overall  $R^2$ , then we could conclude that PAFit contains some  
289 explanatory power that frequency could not offer. Results of this analysis  
290 is showed in discussion. Detailed information about the method could be  
291 found in the previous study (Ray-Mukherjee *et al.* 2014). R packages  
292 ‘yhat’(Nimon *et al.* 2013) and ‘vegan’(Oksanen *et al.* 2013) were used to  
293 complete the tasks of calculation and visualization in commonality analysis.

### 294 **3. Results**

#### 295 **3.1. Overview of ecological knowledge network**

296 From 1988 to 2017, the network density had decreased from  $1.82 \times 10^{-3}$  to  
297  $2.51 \times 10^{-4}$ (Fig.4A), which showed that the possibility for any two ecology-  
298 related keywords to co-occur in the same article was dropping in the recent  
299 three decades. Pearson correlation analysis showed that annual network  
300 density was negatively correlated with the distinct keyword number  
301 occurring in each year ( $r = -0.85$ ,  $P < 0.01$ ). The reason of the dropping



302 density these years might be the exploding article number which brought  
303 numerous different keywords into the ecological area (Fig.1).

304 Focusing on the degree distribution of the network, we found that it  
305 followed a power law distribution with a long tail, which indicated that  
306 very few nodes had extremely large amount of connections. It indicates  
307 that only few keywords could be enlisted time after time in the keyword  
308 area in ecological journals, while others appeared only once and never  
309 showed up again. Digging deeper, we could find that the point at the far  
310 right was the keyword “climate change”. With an occurrence number of  
311 6,939, it was able to co-occur with 16,775 different keywords in the same  
312 article, and the penultimate point at the right is “biodiversity”, occurring  
313 4,975 times and was related to 12,113 different keywords. On the other  
314 hand, it was found that 212,514 keywords had occurred only once and  
315 38,018 occurred only twice. For these words, they could only co-occur with  
316 the keywords appearing in their same articles, therefore possessed a quite  
317 low degree (but not one, unless the article contained only one keyword). In  
318 such a background, if we could grasp the very few keywords with the  
319 highest degree, it’s possible for us to get a rather clear picture about the  
320 most popular topics in ecology.

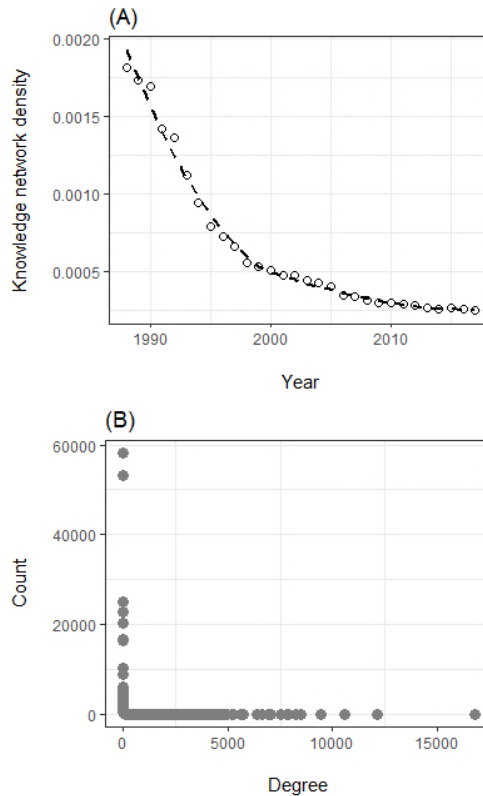

321

322

323 **Fig.4 Basic property of the ecological knowledge network. (A) Temporal change of network**  
324 **density. (B) Degree distribution of the network.**

325

### 326 **3.2. Possible risks when using frequency to measure popularity in** 327 **keyword analysis**

328 Frequency had long been used to measure the popularity of topics in  
329 keyword analysis. Nevertheless, a keyword could have a large frequency  
330 simply for the reason that more papers about this topic were published in  
331 the investigated period, while other keywords might have relatively lower  
332 frequency but still be capable of making various links to different topics in  
333 the discipline. Inspecting the keywords with relatively higher frequency

334 but lower degree, we could find that frequency tend to overestimate the  
335 popularity of ecological topics in microcosmic scale. In Table 1, the top 20  
336 overestimated keywords were showed, we could find “aposematism” at the  
337 top of the list, which is a concept in evolutionary ecology, followed by  
338 “wolbachia” (all keywords were displayed in lower case), coming from  
339 subfield of microbial ecology. Take a further step, we found that the main  
340 sources of articles containing the top 20 keywords in this list were  
341 Evolution (462 articles containing at least one of these keywords),  
342 Proceedings of The Royal Society B: Biological Sciences (437),  
343 Behavioral Ecology and Sociobiology (363), Journal of Evolutionary  
344 Biology (353), FEMS Microbiology Ecology (336) and Molecular Ecology  
345 (332).

346 On the contrary, keywords related to macroscopic ecology tended to be  
347 underestimated by frequency metric, including words like “plant  
348 population and community dynamics”, “determinants of plant community  
349 diversity and structure” ,“el niño”, “conservation biogeography” and  
350 “invasion ecology”(Table 2). Researches of macroscopic ecology are  
351 usually supported by large-scale spatial-temporal observations, which  
352 demands longer research cycle. This would definitely decrease the quantity  
353 of papers in the subfield, and consequently decrease number of relevant  
354 keywords. Interestingly, we found two other sorts of keywords that tend to  
355 be underestimated by frequency. One is keywords related to chemical

356 ecology, including “semiochemicals”, “monoterpenes” and “kairomone”.  
357 It seemed that chemical ecology has a great potential to be applied in  
358 different aspects of ecology, while the paper volume in this subfield might  
359 be relatively low currently. The other was keywords related to methods in  
360 ecology and evolution, including “bayesian analysis”, “gc-ms” and “field  
361 experiment”. Among these words, “gc-ms” is closely related to chemical  
362 ecology, while “field experiment” is usually implemented on studies  
363 concerning macroscopic ecology. What we should notice is that as a  
364 challenger of frequentist statistics, Bayesian statistics has now gained its  
365 popularity in ecology. However, this popularity might be underestimated  
366 if we only focus how many times this keyword occurred in the previous  
367 literatures.  
368 All in all, though frequency is always positively correlated with degree (in  
369 our case, we got a Pearson correlation coefficient of 0.98,  $P < 0.01$ ), using  
370 it alone might misestimate the keyword popularity, and degree metric  
371 yielded based on the knowledge network could provide good  
372 supplementary information to fill the gap.

373

374 **Table 1 Top 20 keywords that tend to be overestimated by frequency**

375

| keyword         | freq | degree | freq_rank | degree_rank | $\Delta$ rank |
|-----------------|------|--------|-----------|-------------|---------------|
| aposematism     | 168  | 501    | 988       | 1550        | -562          |
| wolbachia       | 282  | 684    | 488       | 1028        | -540          |
| parthenogenesis | 217  | 593    | 704       | 1240        | -536          |
| social insects  | 264  | 697    | 541       | 1001        | -460          |
| epistasis       | 244  | 666    | 606       | 1061        | -455          |

|                      |     |     |     |      |      |
|----------------------|-----|-----|-----|------|------|
| archaea              | 177 | 554 | 920 | 1375 | -455 |
| assortative mating   | 200 | 591 | 792 | 1245 | -453 |
| mating systems       | 179 | 562 | 907 | 1347 | -440 |
| polyandry            | 333 | 816 | 378 | 787  | -409 |
| macroevolution       | 218 | 647 | 700 | 1109 | -409 |
| microphytobenthos    | 209 | 636 | 738 | 1131 | -393 |
| paternity            | 249 | 711 | 585 | 970  | -385 |
| polygyny             | 184 | 584 | 884 | 1265 | -381 |
| genetic correlation  | 228 | 679 | 661 | 1041 | -380 |
| cooperative breeding | 327 | 826 | 394 | 770  | -376 |
| 16s rna gene         | 197 | 614 | 806 | 1181 | -375 |
| brood parasitism     | 210 | 648 | 732 | 1105 | -373 |
| bacterioplankton     | 214 | 668 | 716 | 1057 | -341 |
| phytoremediation     | 191 | 615 | 847 | 1177 | -330 |
| bacterial diversity  | 183 | 601 | 889 | 1219 | -330 |

376 **freq: keyword frequency; freq\_rank: ranking by frequency; degree\_rank: ranking by**  
 377 **degree; Δrank: the difference between freq\_rank and degree\_rank, namely  $freq\_rank -$**   
 378  **$degree\_rank$**

379

380 **Table 2 Top 20 keywords that tend to be underestimated by frequency**

381

| keyword                                                 | freq | degree | freq_rank | degree_rank | Δrank |
|---------------------------------------------------------|------|--------|-----------|-------------|-------|
| semiochemicals                                          | 123  | 713    | 1469      | 967         | 502   |
| plant population and community dynamics                 | 129  | 750    | 1390      | 897         | 493   |
| bayesian analysis                                       | 145  | 779    | 1192      | 843         | 349   |
| monoterpenes                                            | 143  | 759    | 1220      | 882         | 338   |
| gc-ms                                                   | 143  | 758    | 1220      | 884         | 336   |
| determinants of plant community diversity and structure | 170  | 922    | 972       | 643         | 329   |
| chemical ecology                                        | 141  | 724    | 1249      | 945         | 304   |
| el niño                                                 | 140  | 716    | 1256      | 962         | 294   |
| conservation biogeography                               | 158  | 822    | 1065      | 781         | 284   |
| historical ecology                                      | 143  | 731    | 1220      | 936         | 284   |
| invasion ecology                                        | 163  | 835    | 1030      | 760         | 270   |
| long-term monitoring                                    | 159  | 808    | 1056      | 793         | 263   |
| kairomone                                               | 146  | 735    | 1184      | 930         | 254   |
| path analysis                                           | 208  | 1094   | 746       | 496         | 250   |
| bioassay                                                | 197  | 1018   | 806       | 558         | 248   |
| resource limitation                                     | 145  | 719    | 1192      | 956         | 236   |
| autocorrelation                                         | 157  | 779    | 1078      | 843         | 235   |
| bayesian                                                | 193  | 965    | 831       | 607         | 224   |

|                    |     |      |      |     |     |
|--------------------|-----|------|------|-----|-----|
| water availability | 147 | 722  | 1172 | 952 | 220 |
| field experiment   | 250 | 1284 | 584  | 366 | 218 |

382 **freq:** keyword frequency; **freq\_rank:** ranking by frequency; **degree\_rank:** ranking by  
 383 **degree;** **Δrank:** the difference between **freq\_rank** and **degree\_rank**, namely *freq\_rank* –  
 384 *degree\_rank*

385

### 386 **3.3. Measuring keyword popularity in a temporal dynamical** 387 **network using PAFit**

388 In Table 3, we could find that popularity metrics from the past 27 years  
 389 could welly predict the growth of frequency and degree in the following 3  
 390 years (with  $R^2$  all larger than 0.75). The frequency metric performed better  
 391 than degree at predicting the future growth of frequency ( $R^2 = 0.82 > 0.77$ ),  
 392 while the degree metric surpassed frequency at predicting the future growth  
 393 of degree ( $R^2 = 0.79 > 0.76$ ). However, both metrics were beat by PAFit,  
 394 no matter in frequency growth prediction or degree growth prediction ( $R^2$   
 395 reached 0.89 in both tests).

396

397 **Table 3 Comparison of performance when using simple linear regression to**  
 398 **predict the keyword popularity by different metrics**

399

| Predictor | Predicting      |       |                    |       |
|-----------|-----------------|-------|--------------------|-------|
|           | Δfrequency      |       | Predicting Δdegree |       |
|           | Formula         | $R^2$ | Formula            | $R^2$ |
| Frequency | $y=-0.20+0.25x$ | 0.82  | $y=0.80+0.66x$     | 0.76  |
| Degree    | $y=-0.59+0.07x$ | 0.77  | $y=-0.42+0.20x$    | 0.79  |
| PAFit     | $y=-0.53+0.11x$ | 0.89  | $y=-0.21+0.30x$    | 0.89  |

400

401 Ranking the keywords from the total 30 years' data according to PAFit, we  
402 could detect the ecological hotspots in the recent three decades (Table 4).  
403 The top 10 ecological topics in descending order were “climate change”,  
404 “biodiversity”, “invasive species”, “conservation”, “ecosystem services”,  
405 “dispersal”, “species richness”, “competition”, “functional traits” and  
406 “disturbance”. It was noteworthy that “invasive species”, “ecosystem  
407 services” and “functional traits” have relatively lower frequency and  
408 degree among the top 10 keywords, however, their intrinsic fitness ( $\eta$ ) were  
409 very high, which indicates that there are great chances for these topics to  
410 become more prevalent in the future.

411

412 **Table 4 Top 10 ecological hotspots ranked by PAFit**

413

| Rank | Keyword            | Frequency | Degree | $A_k$   | $\eta$ | PAFit    |
|------|--------------------|-----------|--------|---------|--------|----------|
| 1    | climate change     | 6946      | 16775  | 1113.87 | 17.05  | 18994.72 |
| 2    | biodiversity       | 4979      | 12113  | 880.74  | 10.96  | 9651.13  |
| 3    | invasive species   | 2759      | 7829   | 642.91  | 14.25  | 9163.13  |
| 4    | conservation       | 4301      | 10559  | 797.71  | 9.33   | 7438.73  |
| 5    | ecosystem services | 1528      | 4563   | 435.57  | 16.85  | 7338.87  |
| 6    | dispersal          | 3188      | 8480   | 681.03  | 8.37   | 5702.52  |
| 7    | species richness   | 3003      | 7907   | 647.52  | 8.73   | 5650.68  |
| 8    | competition        | 3381      | 9436   | 735.57  | 7.46   | 5484.70  |
| 9    | functional traits  | 672       | 2513   | 283.29  | 18.70  | 5296.33  |
| 10   | disturbance        | 3010      | 8236   | 666.84  | 7.58   | 5057.54  |

414

## 415 **4. Discussions**

### 416 **4.1. Strong correlations between metrics discussed in our study**

417 In our study, we have used three metrics to measure the popularity of  
418 ecological topics, namely frequency, degree and PAFit. In essence, the  
419 growth of degree is a sufficient but not necessary condition for the growth  
420 of frequency. That is to say, when the degree of a keyword rises, the  
421 frequency would definitely increase. Nevertheless, the opposite might  
422 not be true when the keyword is related to merely several keywords in its  
423 subfield. According to our results, some topics in microcosmic ecology  
424 could gain a relatively high frequency due to the average short research  
425 cycle. That is why degree could be a good supplementary metric to  
426 frequency. And when we consider the popularity of keywords in a  
427 network, we noticed that the “rich-get-richer” and “fit-get-richer”  
428 phenomenon did exist in our temporal network. This was testified by the  
429 superior performance of PAFit in predicting the growth of frequency and  
430 degree, beating the frequency and degree metrics themselves.

431 But take a step backward and we could find that the three metrics  
432 discussed in our study are obviously correlated with each other. For one,  
433 frequency of a keyword could also be interpreted as how many articles  
434 containing a specific ecological topic were published in the investigated  
435 period. The more the frequency, the more likely that this ecological topic



436 could be related to other ecological topics. Therefore, there is a  
437 statistically strong positive correlation between frequency and degree in  
438 most cases. On the other hand, when consider things in a network, degree  
439 is actually a component of PAFit. As the equation of PAFit could be  
440 displayed as:  $PAFit = k^\alpha \times \eta$ , where  $k$  is the degree,  $\alpha$  is the attachment  
441 component and  $\eta$  is the node fitness. When we make  $\alpha=1$ ,  $\eta=1$ , this  
442 becomes equivalent to degree. Technically speaking, using degree to  
443 measure popularity is a specific case of PAFit, where we make  
444 assumptions that node fitness mechanism does not exist and the  
445 attachment component equals to 1. This model had been discussed and  
446 the pattern was coined as “scale-free feature” in 1999 by Barabási and  
447 Albert, and PAFit was a developed model built on this.  
448 So should we use PAFit alone to measure keyword popularity? The  
449 technical answer might be yes. If we define popularity the same way as  
450 mentioned in our method, then we could do a commonality analysis to  
451 clarify the relations among the three metrics. When predicting the  
452 frequency growth, if we already include PAFit in the model, adding  
453 degree and frequency could only promote 3.36% of the total adjusted  $R^2$   
454 (Table 5), and this promotion reduced to 0.40% when predicting the  
455 degree growth (Table 6). The overlapping area of variance commonly  
456 explained by the three metrics reached 0.79 and 0.76 for predicting  
457 frequency growth and degree growth respectively (Fig.5). This is already

458 a great amount, which means that frequency alone could grasp the most  
459 general trends in keyword analysis. However, the explained variance  
460 brought by PAFit (0.10 predicting frequency growth and 0.11 predicting  
461 degree growth) was irreplaceable and could make a real difference in the  
462 popularity measurement.

463

464 **Table 5 Partition table of variance when predicting the change of frequency**

465

|                            | Ajusted R <sup>2</sup> | %Total  |
|----------------------------|------------------------|---------|
| Frequency                  | 0.816                  | 88.55%  |
| Degree                     | 0.768                  | 83.38%  |
| PAFit                      | 0.890                  | 96.64%  |
| Degree + Frequency         | 0.817                  | 88.73%  |
| Frequency + PAFit          | 0.892                  | 96.81%  |
| Degree + PAFit             | 0.895                  | 97.17%  |
| Degree + Frequency + PAFit | 0.921                  | 100.00% |

466

467 **Table 6 Partition table of variance when predicting the change of degree**

468

|                            | Ajusted R <sup>2</sup> | %Total  |
|----------------------------|------------------------|---------|
| Frequency                  | 0.765                  | 84.95%  |
| Degree                     | 0.793                  | 88.04%  |
| PAFit                      | 0.897                  | 99.60%  |
| Degree + Frequency         | 0.793                  | 88.06%  |
| Frequency + PAFit          | 0.901                  | 99.96%  |
| Degree + PAFit             | 0.899                  | 99.74%  |
| Degree + Frequency + PAFit | 0.901                  | 100.00% |

469

470 Nevertheless, in practice frequency and degree are more intuitional  
471 indexes than PAFit. Frequency is the number of articles containing the  
472 keyword, degree is the number of keywords that co-occur with the  
473 keyword in the same article. PAFit is a metric that could be used to

474 measure the probability of the keyword to co-occur with other keywords,  
475 which could be a little abstract to understand. Therefore, we believe that  
476 PAFit is the best metric to use when we try to measure keyword  
477 popularity, but frequency and degree should always be provided as  
478 supplementary metrics so that we could explain our results more  
479 intuitively.  
480

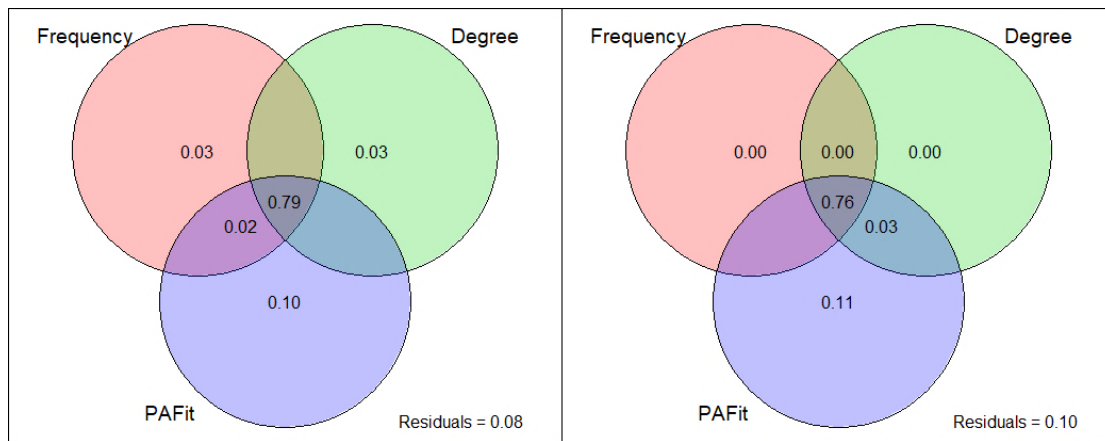

481

482

483 **Fig.5 Using variation partition analysis to clarify the explainable variance among three**  
484 **metrics (frequency, degree and PAFit) when predicting the changes of frequency (left) and**  
485 **degree (right).**

486

## 487 **4.2. The latent capability of node fitness to detect potential ecological** 488 **hot topics**

489 Previous discussion had shown that PAFit could totally replace frequency  
490 and degree when our task was to predict keywords' popularity, and the  
491 unique variance that it surpasses the other two metrics actually comes

492 from the special consideration of node fitness. Node fitness could explain  
493 why late-comers could surpass first-movers, which would never happen  
494 in rich-get-richer mechanism. Previous study had used node fitness to  
495 measure the competitiveness of authors in a citation network (Ronda-  
496 Pupo and Pham 2018). It was observed that some late-comers acquired  
497 even more citations than the first-movers in scientific publication  
498 (Newman 2009). The main reason was interpreted as the fitness could  
499 reflect the qualities of the authors' scientific contributions. In our case,  
500 the keyword fitness reflects the innate popularity of an ecological topic.  
501 Some ecological topics did not appear until very late in the disciplinary  
502 history, while others might be coined but not prevailed then. But when  
503 these topics meet the needs of time, they could get hot in a rather short  
504 period. For instance, the concept of "ecosystem services" had been  
505 suggested in late 2000s, but it did not gain a real leap in popularity until  
506 the monumental work Millennium Ecosystem Assessment was published  
507 in 2005(Fisher et al. 2009).

508 According to our study, we could find that node fitness had weak  
509 correlations with other metrics (Table 7), which indicates that it has a  
510 potential to offer new explainable power for the invisible popularity of  
511 ecological topics that usually neglected by the common view. We had  
512 used frequency growth and degree growth to reflect the keyword  
513 popularity, but when we take growth rate (divide growth by the original

514 number of frequency or degree) into consideration, we found that fitness  
515 is more correlated to frequency growth rate and degree growth rate than  
516 other metrics. Based on our research data, we made a list of the top 10  
517 potential ecological hotspots based on node fitness(Table 8). Compared  
518 with the hotspots we found using PAFit (Table 4), we could find that  
519 some of fittest keywords had already gained much popularity, including  
520 “functional traits”, “climate change” and “ecosystem services”.  
521 Moreover, it seems that molecular technology has great potential to  
522 develop the discipline of ecology, with many potential hot topics like  
523 “metabarcoding”, “high-throughput sequencing”, “next-generation  
524 sequencing”.

525

526 **Table 7 Correlations among popularity metrics and their correlation with degree**  
527 **and frequency growth rate**

528

|                       | Fitness | Degree | Frequency | PAFit |
|-----------------------|---------|--------|-----------|-------|
| Degree                | 0.54    |        |           |       |
| Frequency             | 0.47    | 0.98   |           |       |
| PAFit                 | 0.62    | 0.95   | 0.94      |       |
| Degree growth rate    | 0.10    | 0.02   | 0.02      | 0.03  |
| Frequency growth rate | 0.14    | 0.04   | 0.03      | 0.05  |

529

530 **Table 8 Top 10 ecological hotspots ranked by keyword fitness**

531

| rank | word               | fitness |
|------|--------------------|---------|
| 1    | functional traits  | 18.70   |
| 2    | climate change     | 17.05   |
| 3    | ecosystem services | 16.85   |
| 4    | metabarcoding      | 16.36   |
| 5    | citizen science    | 16.23   |

---

|    |                             |       |
|----|-----------------------------|-------|
| 6  | high-throughput sequencing  | 16.10 |
| 7  | environmental filtering     | 15.85 |
| 8  | next-generation sequencing  | 15.43 |
| 9  | species distribution model  | 15.41 |
| 10 | cultural ecosystem services | 15.07 |

---

532

533 **4.3. Application of egocentric network analysis to explore the trends**  
534 **in subfields**

535 In bibliometric study, keyword analysis are commonly used to analyze  
536 the trend of a specific research area, and frequency are often used as the  
537 only criteria to quantify keyword popularity (Aleixandre-Benavent et al.  
538 2018, Romanelli et al. 2018, Yin et al. 2018). After the calculation of  
539 frequency, keywords are ranked and the top keywords are selected to  
540 reflect the research hotspots. Our study showed that PAFit is a better  
541 metric to measure keyword popularity, because it has considered both  
542 accumulative advantage and innate attractiveness of topics represented by  
543 keywords. However, another important point should not be neglected,  
544 that is we considered ecological topics were related in a knowledge  
545 network. In our study we had tested our assumptions using all the  
546 information we had in the selected ecological journals. But if we were  
547 only interested in a subfield in ecology, we could easily extract the  
548 relevant data and establish a local network, so as to explore the trends in  
549 the subfield.

550 In social science, egocentric network analysis has been widely used to  
551 understand individuals and their immediate social environment (Wu et al.  
552 2016, Perry et al. 2018). Ego network consists of a focal node (“ego”) and  
553 nodes that directly connected to it (“alters”). When it comes to our  
554 ecological knowledge network, constructing ego networks could help us  
555 dig deep into a subfield. For example, if a research team focuses on doing  
556 ecological research using remote sensing, they might take interests in the  
557 existing hotspots and potential hot topics. In this way, we could build an  
558 ego network with the focal keyword “remote sensing” (Fig.6). All the  
559 keywords appearing in the network had been co-occurred with “remote  
560 sensing” in the same article at least once. In the local scale, “remote  
561 sensing” tend to co-occur more with keywords “climate change”,  
562 “biodiversity”, “conservation”, “species richness” and “disturbance”  
563 (displayed in triangular nodes). In the global scale, “climate change”,  
564 “conservation”, “ecosystem services”, “biodiversity” and “invasive  
565 species” were the most popular among topics related to remote sensing in  
566 ecology (nodes in red), and the top 5 potential hot topics were “climate  
567 change”, “ecosystem services”, “plant-plant interactions”, “functional  
568 traits” and “citizen science”. Topics like “climate change” had been  
569 popular already and are going to be even more popular in the future,  
570 researchers in this subfield had recognized its importance and lots of  
571 studies had performed on this topic. Topics like “citizen science”, on the

572 other hand, were rarely mentioned in ecology and there were relatively  
573 fewer researches concerning both remote sensing and citizen science at  
574 the moment, but there's great hope that citizen science would be  
575 combined with remote sensing and make great contributions to the  
576 development of ecology in the future.

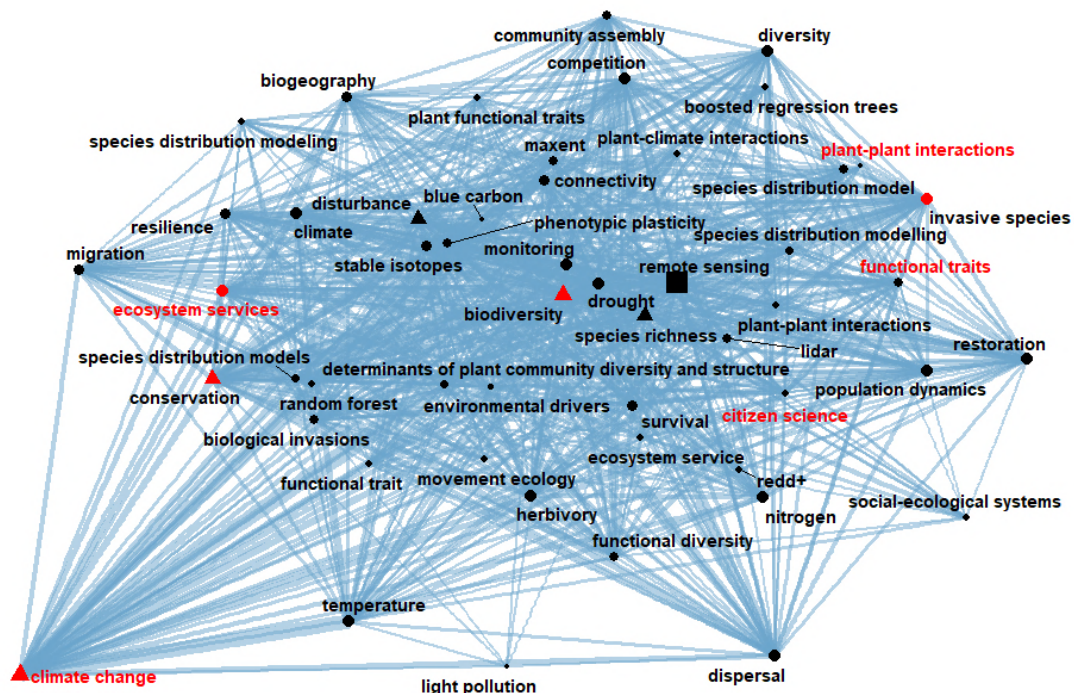

577

578

579 **Fig.6 Egocentric network analysis for “remote sensing”. The square node in the middle is**  
580 **“remote sensing”. Sizes of nodes are proportional to the local degree of the nodes in the ego**  
581 **network, and the top 5 local popular keyword are in the shape of triangle. Width of edges**  
582 **are proportional to the number of co-occurrence between keywords. Nodes are selected**  
583 **according to their PAFit and fitness in the complete network, top 30 fittest and top 30 most**  
584 **popular keywords are chosen to establish the network. Nodes in red are top 5 popular**  
585 **keywords, nodes with red labels are top 5 fittest keywords.**

586



## 587 **5. Conclusions**

588 In our study, we have displayed our ecological knowledge structure in the  
589 form of network, which enables us to better quantify the popularity of  
590 ecological topics. This will definitely promote our comprehension on the  
591 whole discipline as well as development in every subfield of ecology.  
592 Ecological knowledge network could be constructed to depict the  
593 ecological development in different time ranges, different regions and  
594 different domains, and considering the abundant achievements in graph  
595 theory and various applications in network analysis, more interesting  
596 discoveries could be found in ecological knowledge network. In the era of  
597 “big literature”, with large amount of accessible data and all sorts of  
598 digital tools at hand, we are capable of drawing a tremendous map of our  
599 ecological world. We believe this map could give us a clearer picture of  
600 our discipline, and guide us to more collaborations, deeper discipline  
601 integration and better researches in the future.

## 602 **References**

- 603 Aleixandre-Benavent R., Aleixandre-Tudó J.L., Castelló-Cogollos L. &  
604 Aleixandre J.L. (2018). Trends in global research in deforestation. A  
605 bibliometric analysis. *Land Use Policy*, 72, 293-302.
- 606 Al-Taie M.Z. & Kadry S. (2017). Python for graph and network analysis.

- 607 Springer International Publishing.
- 608 Barabási A. & Albert R. (1999). Emergence of scaling in random networks.  
609 SCIENCE, 286, 509-512.
- 610 Bianconi G. & Barabási A. (2001). Competition and multiscaling in  
611 evolving networks. EPL (Europhysics Letters), 54, 436.
- 612 Budilova E.V., Drogalina J.A. & Teriokhin A.T. (1997). Principal trends  
613 in modern ecology and its mathematical tools: An analysis of publications.  
614 SCIENTOMETRICS, 39, 147-157.
- 615 Chen D., Liu Z., Luo Z., Webber M. & Chen J. (2016). Bibliometric and  
616 visualized analysis of energy research. ECOL ENG, 90, 285-293.
- 617 Csardi G. & Nepusz T. (2006). The igraph software package for complex  
618 network research. InterJournal, Complex Systems, 1695, 1-9.
- 619 Ferreira, Neckeloliveira L.V., SelvinoGalatti, UlissesFáveri & Parolin S.B.  
620 (2012). Forest structure of artificial islands in the Tucuruí dam reservoir in  
621 northern Brazil: a test core-area model. ACTA AMAZON, 42, 221-226.
- 622 Kim J.Y., Joo G.J. & Do Y. (2018). Through 100 years of Ecological  
623 Society of America publications: development of ecological research  
624 topics and scientific collaborations. ECOSPHERE, 9.
- 625 Li J., Wang M.H. & Ho Y.S. (2011). Trends in research on global climate  
626 change: A Science Citation Index Expanded-based analysis. Global &  
627 Planetary Change, 77, 13-20.
- 628 Li Y., Li J. & Xie S. (2017). Bibliometric analysis: global research trends

629 in biogenic volatile organic compounds during 1991–2014. ENVIRON  
630 EARTH SCI, 76, 11.

631 Liu X., Zhang L. & Hong S. (2011). Global biodiversity research during  
632 1900–2009: a bibliometric analysis. Biodiversity & Conservation, 20, 807-  
633 826.

634 Luke D. (2015). A User's Guide to Network Analysis in R. Springer  
635 International Publishing.

636 Nimon K., Oswald F. & Roberts J.K. (2013). yhat: Interpreting Regression  
637 Effects. R package version 2.0-0. Computer Software]. Retrieved from<  
638 <https://CRAN.R-project.org/package=yhat>.

639 Nunez Mir G.C., Iannone B.V., Pijanowski B.C., Kong N. & Fei S. (2016).  
640 Automated content analysis: addressing the big literature challenge in  
641 ecology and evolution. METHODS ECOL EVOL, 7, 1262-1272.

642 Oksanen J., Blanchet F.G., Kindt R., Legendre P., Minchin P.R., O Hara  
643 R.B., Simpson G.L., Solymos P., Stevens M.H.H. & Wagner H. (2013).  
644 Package 'vegan'. Community ecology package, version, 2.

645 Pedersen T.L. (2017). ggraph: An implementation of grammar of graphics  
646 for graphs and networks. R package version 0.1, 1.

647 Pedersen T.L. (2018). tidygraph: A Tidy API for Graph Manipulation. R  
648 Package Version 1.1.0.

649 Pham T., Sheridan P. & Shimodaira H. (2017). PAFit: an R Package for  
650 the non-parametric estimation of preferential attachment and node fitness

651 in temporal complex networks. arXiv preprint arXiv:1704.06017.

652 “Popularity.” Merriam-Webster.com, Merriam-Webster. Accessed 25

653 July 2018.

654 “Popular.” Merriam-Webster.com, Merriam-Webster. Accessed 25 July

655 2018.

656 Ray-Mukherjee J., Nimon K., Mukherjee S., Morris D.W., Slotow R. &

657 Hamer M. (2014). Using commonality analysis in multiple regressions: a

658 tool to decompose regression effects in the face of multicollinearity.

659 *Methods in Ecology & Evolution*, 5, 320–328.

660 Romanelli J.P., Fujimoto J.T., Ferreira M.D. & Milanez D.H. (2018).

661 Assessing ecological restoration as a research topic using bibliometric

662 indicators. *ECOL ENG*, 120, 311-320.

663 Ronda-Pupo G.A. & Pham T. (2018). The evolutions of the rich get richer

664 and the fit get richer phenomena in scholarly networks: the case of the

665 strategic management journal. *SCIENTOMETRICS*, 116, 363-383.

666 Song Y. & Zhao T. (2013). A bibliometric analysis of global forest ecology

667 research during 2002–2011. *SPRINGERPLUS*, 2, 204.

668 Stork H. & Astrin J.J. (2014). Trends in Biodiversity Research — A

669 Bibliometric Assessment. *Open Journal of Ecology*, 04, 354-370.

670 Thompson J.N., Reichman O.J., Morin P.J., Polis G.A., Power M.E.,

671 Sterner R.W., Couch C.A., Gough L., Holt R. & Hooper D.U. (2001).

672 *Frontiers of Ecology: As ecological research enters a new era of*

673 collaboration, integration, and technological sophistication, four frontiers  
674 seem paramount for understanding how biological and physical processes  
675 interact over multiple spatial and temporal scales to shape the earth's  
676 biodiversity. BIOSCIENCE, 51, 15-24.

677 Thong P., Paul S. & Hidetoshi S. (2016). Joint estimation of preferential  
678 attachment and node fitness in growing complex networks. SCI REP-UK,  
679 6, 32558.

680 Wang L., Chen X., Bao A., Zhang X., Wu M., Hao Y. & He J. (2015). A  
681 bibliometric analysis of research on Central Asia during 1990---2014.  
682 SCIENTOMETRICS, 105, 1223-1237.

683 Wang Y., Hou S., Ke F. & Gao H. (2015). Bibliometric analysis of research  
684 on microcystins in China and worldwide from 1991 to 2011. Desalination  
685 & Water Treatment, 53, 272-283.

686 Worster D. (1994). Nature's economy : a history of ecological ideas.  
687 Cambridge University Press.

688 Yang B., Huang K., Sun D. & Zhang Y. (2017). Mapping the scientific  
689 research on non-point source pollution: a bibliometric analysis.  
690 Environmental Science & Pollution Research, 24, 4352-4366.

691 Yin J., Gong L. & Wang S. (2018). Large-scale assessment of global green  
692 innovation research trends from 1981 to 2016: A bibliometric study. J  
693 CLEAN PROD.

694 Zhuang Y., Liu X., Nguyen T., He Q. & Hong S. (2013). Global remote

695 sensing research trends during 1991–2010: a bibliometric analysis.

696 SCIENTOMETRICS, 96, 203-219.

697

698

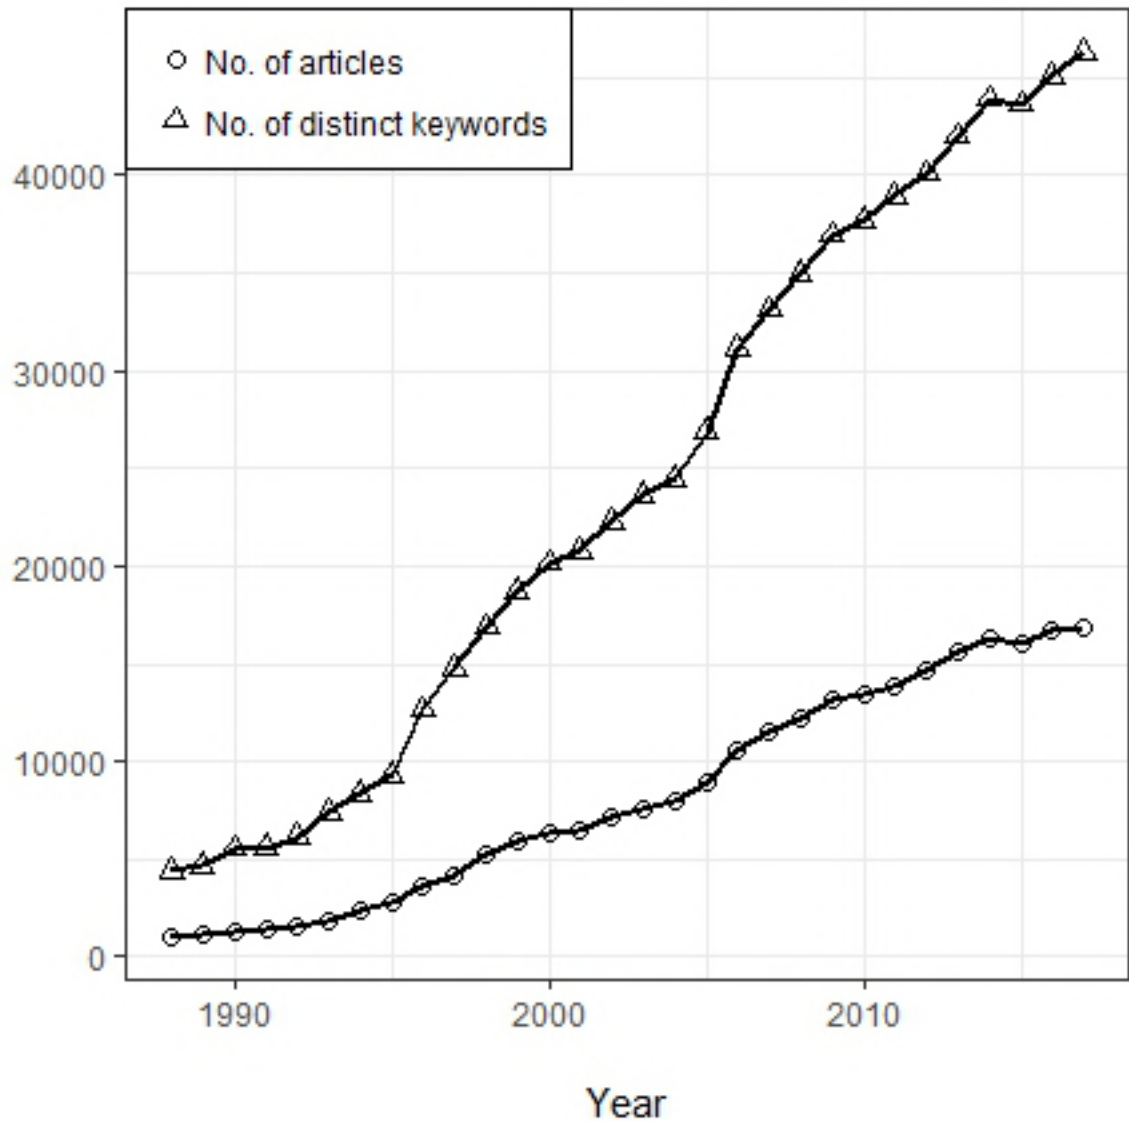

keyword list

core-area model; forest edges; fragmentation; hydroelectric dams

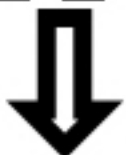

keyword  
co-occurred  
relation

|                 |   |                    |
|-----------------|---|--------------------|
| core-area model | ↔ | forest edges       |
| core-area model | ↔ | fragmentation      |
| core-area model | ↔ | hydroelectric dams |
| forest edges    | ↔ | fragmentation      |
| forest edges    | ↔ | hydroelectric dams |
| fragmentation   | ↔ | hydroelectric dams |

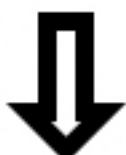

knowledge  
network

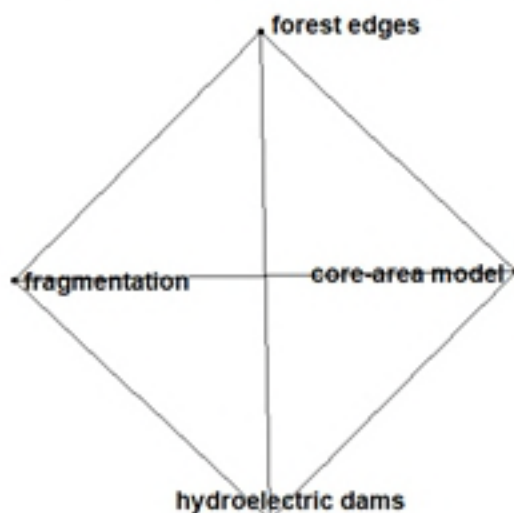







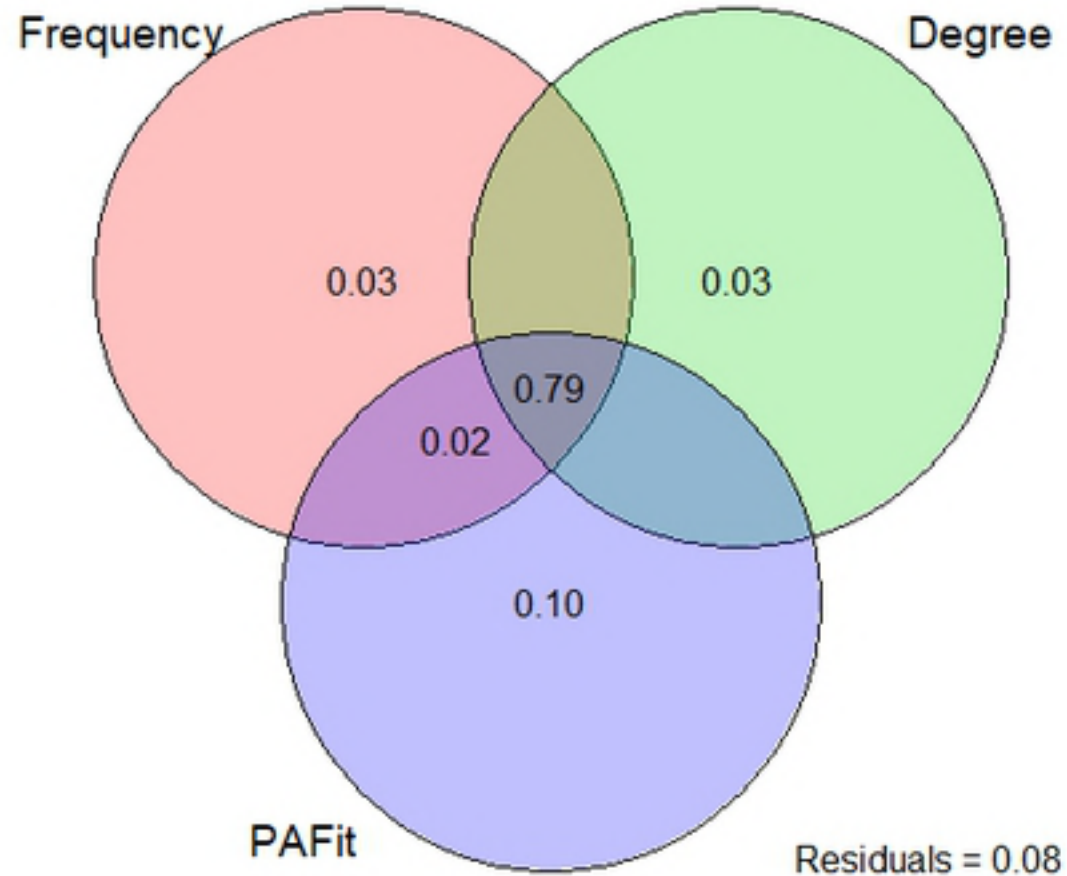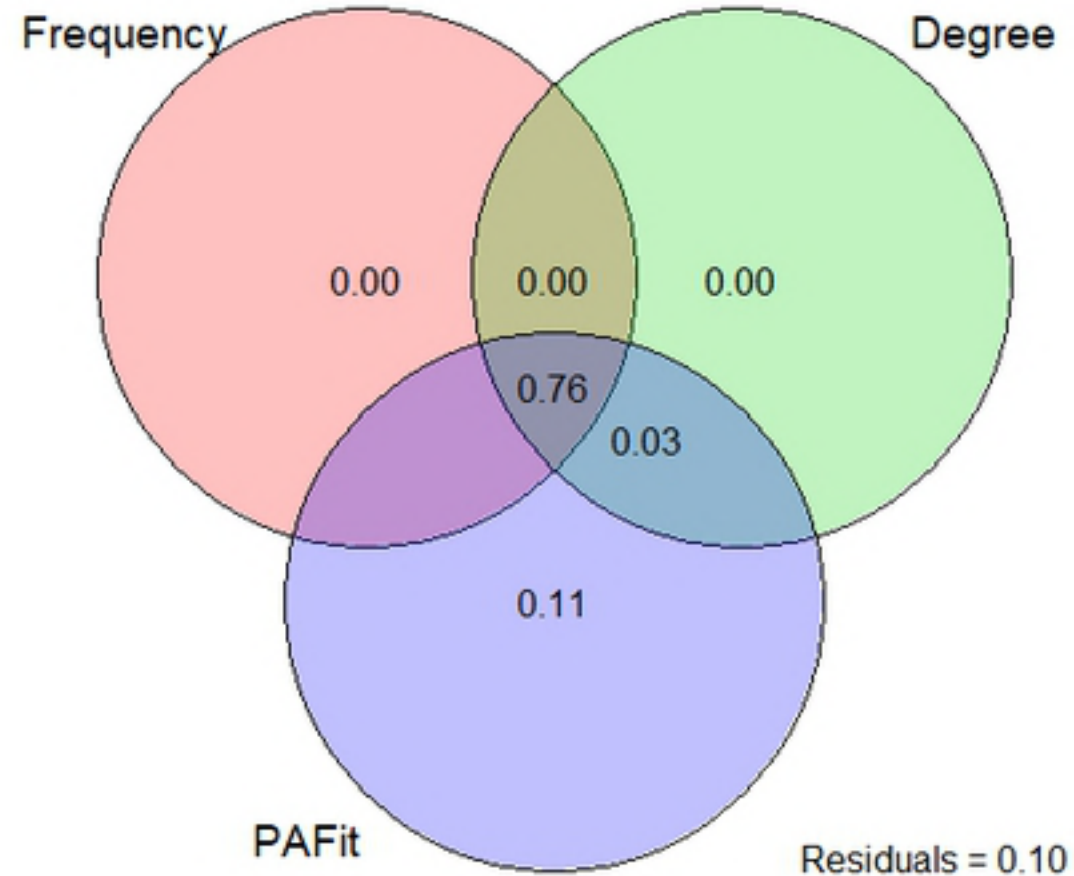

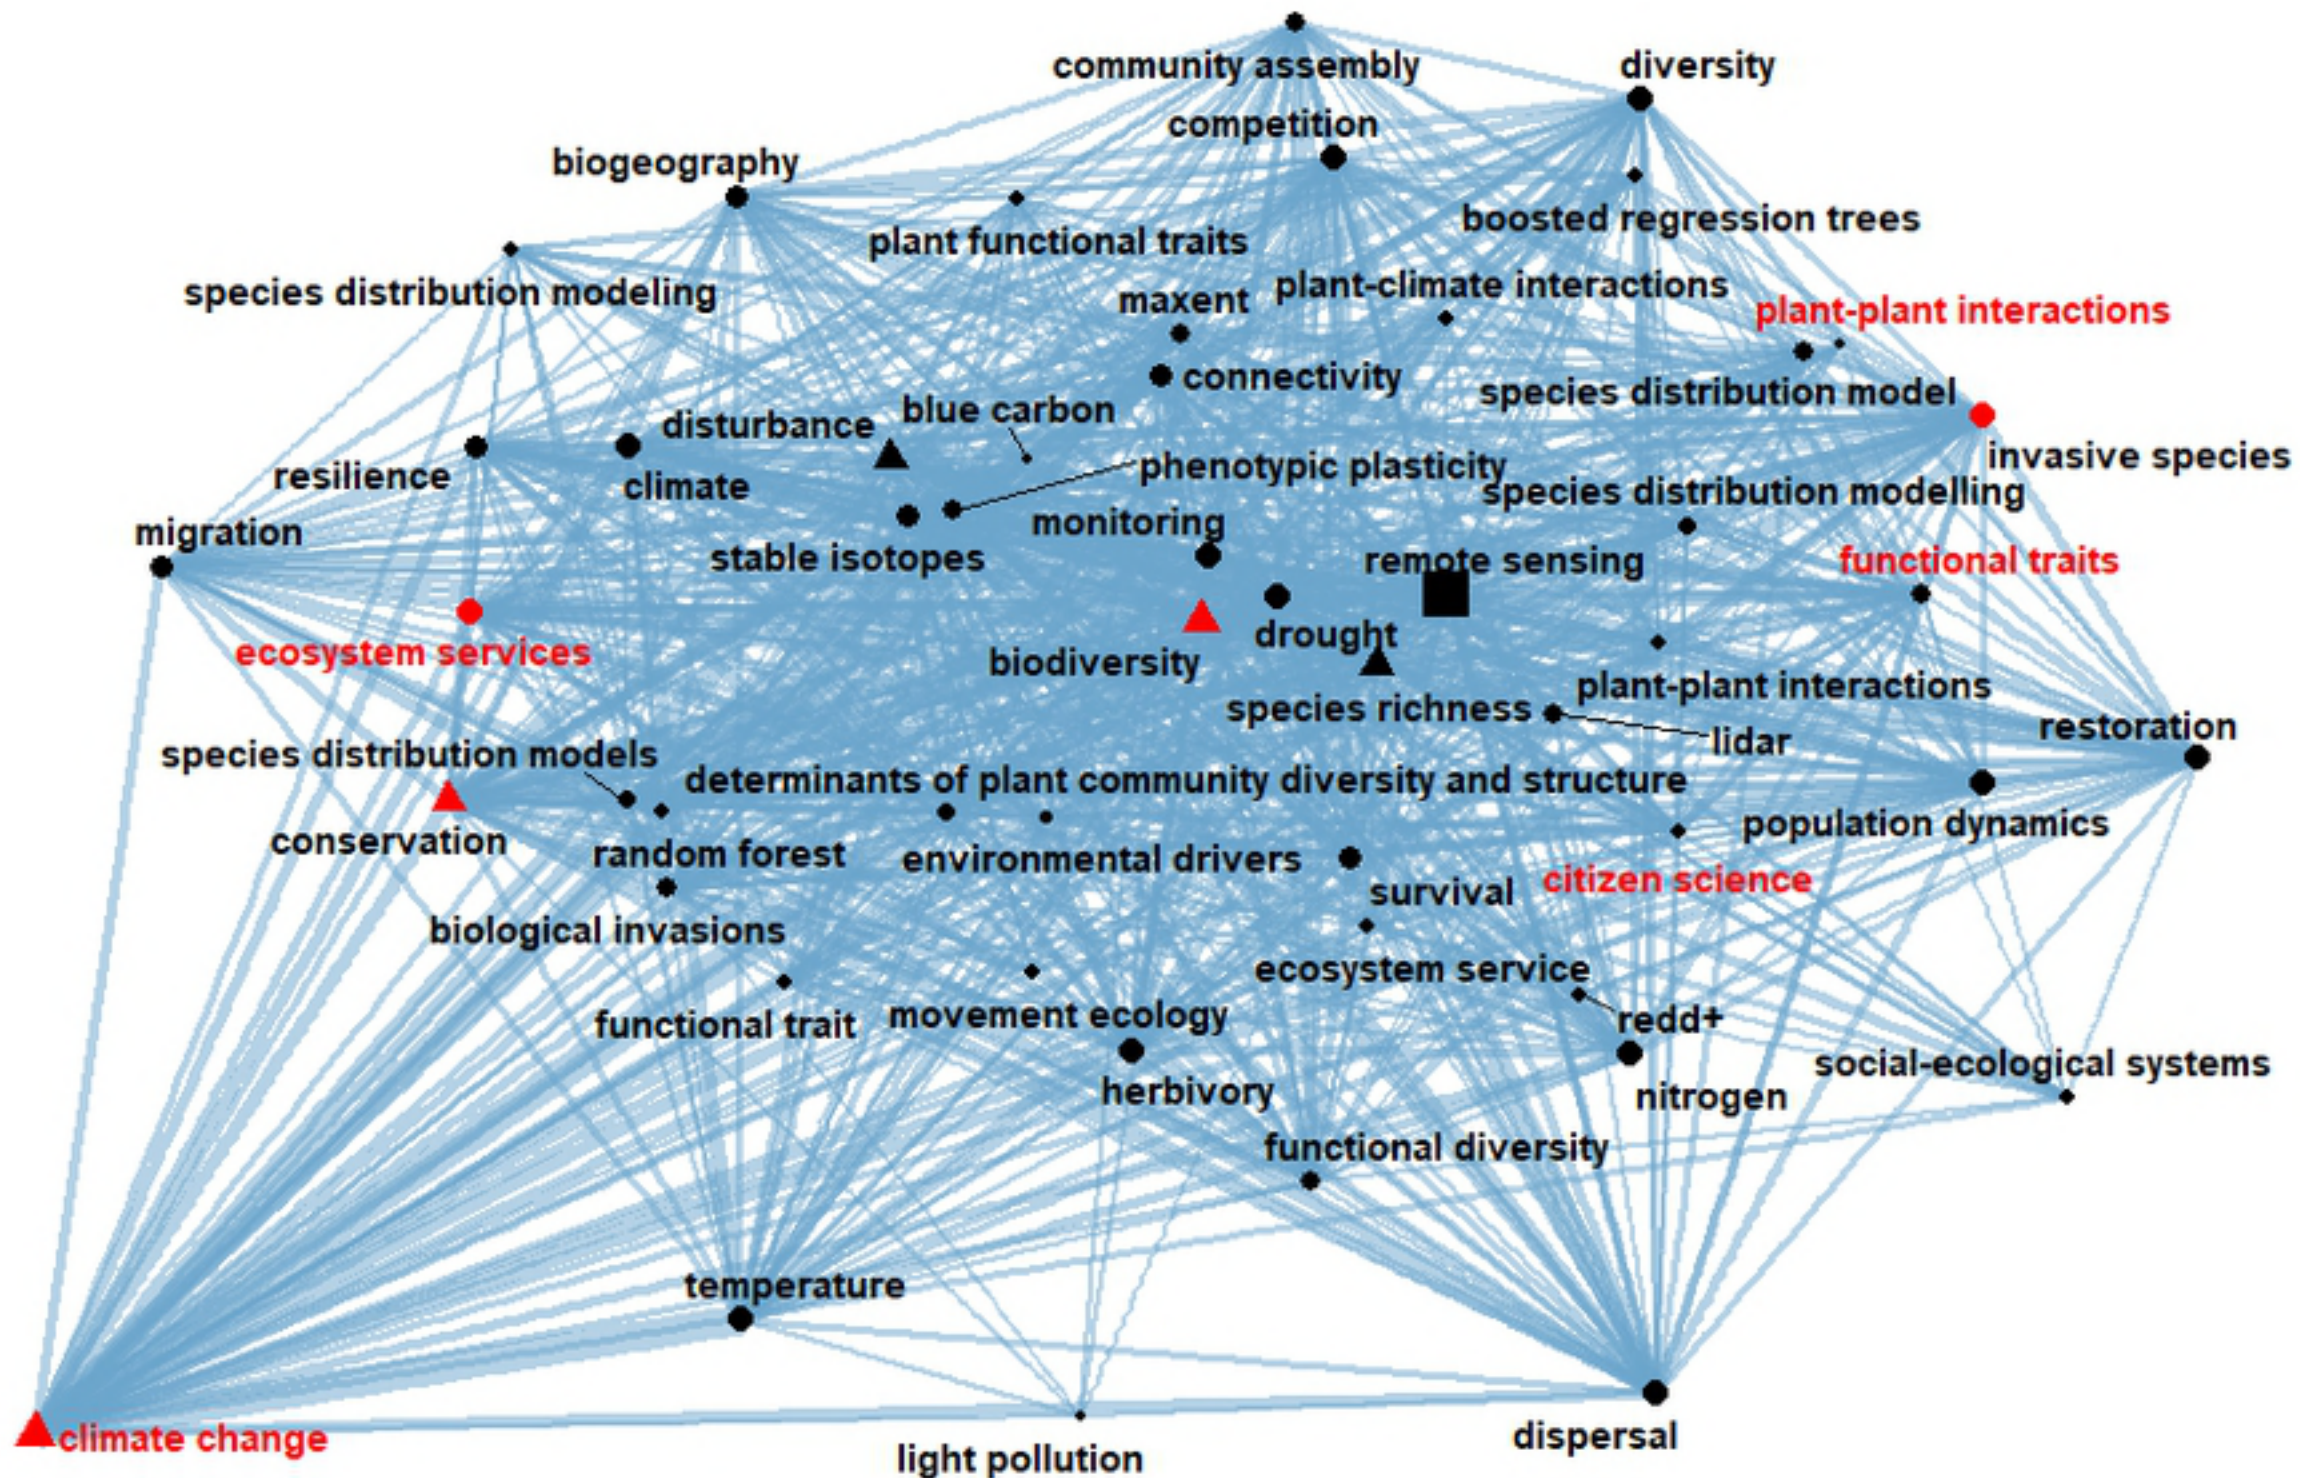

Source: https://www.biorxiv.org/content/10.1101/474148v1.full.pdf
